# Supplementary material
Source: PubMed Central journal article supplement (PMC2040924)
Supplement: pnas_0606552104_1.pdf [file pnas_0606552104_1.pdf]

**A Using VBM covariates: Experts vs. Novices**

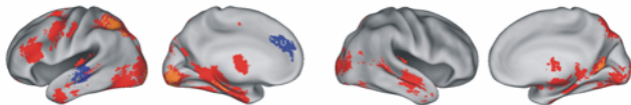

**B 10 Incentive Novices**

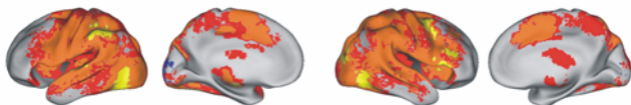

**C 12 Experts vs. 10 Incentive Novices**

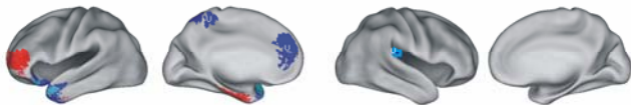

**D 4 Experts (LHEMs) vs. 10 INMs**

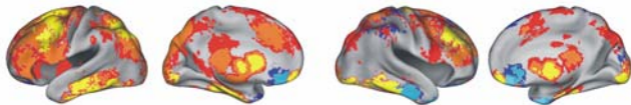

**E Late response 4 MHEMs**

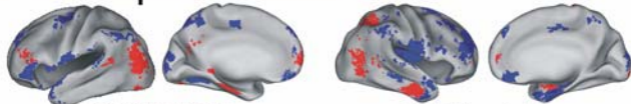

Left Hemisphere

Right Hemisphere
