# Supplementary material
Source: PubMed Central journal article supplement (PMC2040924)
Supplement: pnas_0606552104_3.pdf [file pnas_0606552104_3.pdf]

# Effects of Distracter Sounds in Meditation vs. Rest

**A 13 Expert Meditators ( $\alpha < 0.05$ )**

$p < 0.001$   $p < 0.01$   $p < 0.05$

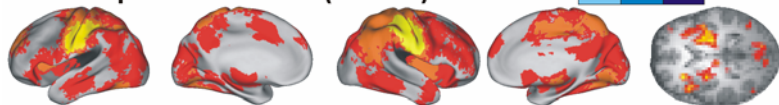

**B 10 Age-Matched Incentive Novices ( $\alpha < 0.05$ )**

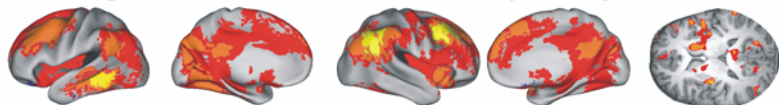

**C 13 Age-Matched Novices ( $\alpha < 0.05$ )**

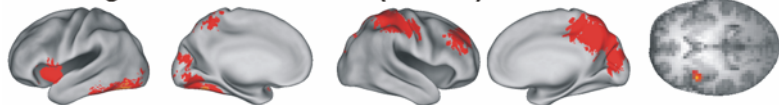

**D 4 MHEMs ( $\alpha < 0.05$ , uncorrected)**

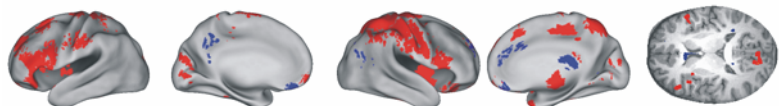

Left Hemisphere

Right Hemisphere

Axial z=11
