# Supplementary material
Source: PubMed Central journal article supplement (PMC2040924)
Supplement: pnas_0606552104_5.pdf [file pnas_0606552104_5.pdf]

**Table 4. Meditation block data: Areas commonly activated by both EMs and NMs**

| ROI                                   | Volume,<br>mm <sup>3</sup> | Talairach coordinates,<br>x, y, and z | EM <i>t</i><br>value | NM <i>t</i><br>value | EM hours<br>partial <i>r</i> value |
|---------------------------------------|----------------------------|---------------------------------------|----------------------|----------------------|------------------------------------|
|                                       |                            | Frontal                               |                      |                      |                                    |
| Left medial front, preSMA, BA6        | 8,691                      | -25, -2, 47                           | 3.8***               | 3.5 **               | -0.67*                             |
| Right MFG, DLPFC, BA6                 | 6,671                      | 28, -5, 48                            | 4.2***               | 3.3**                | -0.66*                             |
| Left IFG, BA47                        | 3,213                      | -48, 7, 21                            | 3.5***               | 3.4**                | -0.61*                             |
| Right IFG, BA47                       | 2,734                      | 42, 18, 13                            | 3.8***               | 2.8*                 | -0.78***                           |
| Left Ins, BA13                        | 2,044                      | -38, 9, 17                            | 3.1**                | 2.9*                 | -0.76**                            |
| Right Ins, BA13                       | 4,171                      | 35, 15, 9                             | 2.9*                 | 2.9*                 | -0.67*                             |
| Parietal/posterior                    |                            |                                       |                      |                      |                                    |
| Right precuneus, IPS, BA7             | 757                        | 29 -46, 37                            | 3.3**                | 3.2**                | -0.22                              |
|                                       |                            | Occipital/temporal                    |                      |                      |                                    |
| Left LO, posterior temporal, BA18, 19 | 5,777                      | -41, -61, -5                          | 4.8***               | 3.9***               | -0.43                              |
| Right LO, BA18, 19                    | 967                        | 38, -68, -5                           | 3.9***               | 3.6***               | -0.48                              |
| Right pSTG, BA41                      | 3,795                      | 49, -28, 9                            | 3.5***               | 3.4**                | -0.70**                            |
| Left pSTG, BA41                       | 1,456                      | -51, -23, 6                           | 3.2**                | 3.8***               | -0.66**                            |
| Noncortical                           |                            |                                       |                      |                      |                                    |
| Left putamen, thalamus                | 1,730                      | -22, -2, 17                           | 2.9*                 | 2.1                  | -0.61*                             |
| Right putamen, thalamus               | 3,108                      | 26, 4, 8                              | 3.1*                 | 2.6*                 | -0.55                              |
| Left globus pallidus <sup>†</sup>     | 614                        | -18, -15, -1                          | 2.8*                 | 2.6*                 | -0.62*                             |
| Left cerebellum                       | 2,091                      | -18, -55, -25                         | 3.5**                | 3.6***               | -0.44                              |
| Left brainstem <sup>†</sup>           | 365                        | -10, -36, -31                         | 3.0*                 | 2.6*                 | -0.35                              |

Data are from a conjunction “And” analysis based on activation for each group at  $P < 0.05$  corrected. Clusters of conjunction are  $P < 0.02$  corrected for multiple comparisons. EM hours *r* value is partial correlation of functional MRI activation with hours of practice, removing the effects of age. \*,  $P < 0.02$ ; \*\*,  $P < 0.01$ ; \*\*\*,  $P < 0.005$ .

† Clusters smaller than corrected.
