# Supplementary material
Source: PubMed Central journal article supplement (PMC2040924)
Supplement: pnas_0606552104_6.pdf [file pnas_0606552104_6.pdf]

**Table 5. Distracting sound data**

| ROI                                            | Volume,<br>mm <sup>3</sup> | <i>x</i> | <i>y</i> | <i>z</i> | EM <i>t</i> value,<br>Med. | NM <i>t</i> value,<br>Med. | INM <i>t</i> value,<br>Med. |
|------------------------------------------------|----------------------------|----------|----------|----------|----------------------------|----------------------------|-----------------------------|
| A. State meditation > neutral                  |                            |          |          |          |                            |                            |                             |
| Bi. P. Cing, precuneus,<br>left fusiform gyrus | 73,747                     | 2.8      | -49.5    | 19.6     | 3.32**                     | 3.22*                      | 2.85*                       |
| Left PrCG, PoCG,<br>BA3,4                      | 8,843                      | -43.4    | -13.9    | 36.9     | 7.77***                    | 2.22                       | 0.28                        |
| Left Ins BA13                                  | 7,539                      | -35.2    | 5.6      | 2.5      | 4.45***                    | 2.90*                      | 2.16                        |
| Right supramarginal,<br>ang, IPL BA40/39       | 5,212                      | -46.8    | -52.1    | 27.6     | 1.83                       | 4.78***                    | 1.73                        |
| Right lentiform,<br>putamen                    | 3,955                      | 25.8     | -0.3     | 5.8      | 4.20**                     | 3.06*                      | 2.08                        |
| Left paracentral, IPS,<br>SPL BA3,40           | 3,111                      | -20.9    | -42.7    | 55.4     | 1.40                       | 0.72                       | 0.51                        |
| Right fusiform BA19                            | 2,959                      | 22.4     | -60.1    | -9.6     | 1.76                       | 2.83*                      | 1.46                        |
| Right MFG/SFG BA9                              | 2,104                      | 23.7     | 41.4     | 33.6     | 1.69                       | 3.80**                     | 2.60*                       |
| Right pMTG/STG<br>BA39,22                      | 1,615                      | -48.6    | -56.9    | 23.7     | 1.77                       | 2.61*                      | 0.87                        |
| Left SFG/MFG BA9                               | 1,260                      | -27.7    | 37.7     | 31.7     | 0.71                       | 2.36*                      | 0.62                        |
| Right SFG/MeFG,<br>BA9/10                      | 801                        | 3.8      | 57.4     | 24.5     | 2.43*                      | 4.02**                     | 1.17                        |
| Left MeFG/SMA                                  | 749                        | -3       | -5.5     | 48.5     | 3.04*                      | 2.31*                      | 1.84                        |
| Left MeFG/SMA                                  | 676                        | -8.3     | 6.7      | 39.7     | 3.64**                     | 3.71**                     | 2.40*                       |

ANOVA: Distracter sounds in Med. vs. Rest (state),  $P < 0.05$  corrected for all three groups (EMs, NMs, and INMs).
