# Supplementary material
Source: PubMed Central journal article supplement (PMC2040924)
Supplement: pnas_0606552104_7.pdf [file pnas_0606552104_7.pdf]

**Table 6. Distracting sound data**

| ROI                                | Volume, mm <sup>3</sup> | Talairach coordinates, x, y, and z | EM <i>t</i> |         | EM <i>t</i> |       | EM <i>t</i> |       | EM – NM     |        |
|------------------------------------|-------------------------|------------------------------------|-------------|---------|-------------|-------|-------------|-------|-------------|--------|
|                                    |                         |                                    | value, Med. | Rest    | value, Med. | Rest  | value, Med. | Rest  | value, Med. | Rest   |
| Right IFG                          | 789                     | 44, 7, 24                          | 3.1**       | -0.96   | 2.7*        | -1.3  | 1           | 1.6   | 3           | 3.1*** |
| Right SFG, MFG, BA6                | 744                     | 24, 2, 54                          | 0.14        | -0.04   | 2.6*        | -2.1  | -0.04       | 1.3   | 1.4         | 3.0**  |
| Left preCG.                        | 2,032                   | -48, -19, 34                       | 5.9***      | -3.0*** | 0.52***     | -1.3  | -1          | 0.24  | 3.4***      | 3.5*** |
| Right IPL, postCG                  | 2,861                   | 47, -40, 40                        | 2.3*        | -0.85   | 2.2*        | -0.29 | 1.3         | 1.1   | 1.8         | 2.2*   |
| Left cerebellum, semilunar         | 1,479                   | -23, -73, -39                      | 1.8         | -3.0*** | 3.4***      | 0.02  | 1.9         | 1.3   | 1.1         | 2.6*   |
| Right parahippocampus, BA36        | 949                     | 28, -39, -6                        | -1.0        | -2.4*   | 2.5*        | -1    | 1.4         | 1.7   | 1.6         | 3.3*** |
| Left globus, subthalamus           | 711                     | -12, -14, -2                       | 5.7***      | -0.54   | 2.7*        | -1.5  | 0.5         | 1.4   | 4.8***      | 3.2*** |
| Right globus, putamen, subthalamus | 679                     | 22, -7, 3                          | 4.7***      | -1.6    | 3.7***      | 0.95  | 2.2*        | 0.99  | 2           | 3.7*** |
| Left putamen                       | 648                     | -25, -3, 3                         | 5.4***      | 1.1     | 2.6*        | 2.2   | 3.6***      | 1.57  | 2.1*        | 3.6*** |
| Right putamen, Ins, BA13           | 620                     | 35, -4, 11                         | 4.7***      | -1.6    | 3.7***      | .95   | 2.2*        | -0.99 | 2.0         | 3.7*** |
| Right thalamus                     | 238                     | 10, -16, 1                         | 5.2***      | 0.01    | 3.2***      | 1.6   | 1.5         | 0.2   | 1.9         | 2.4*   |

State-by-group results from ANOVA for EMs vs. NMs. Areas with significant differences for event-related distracter sounds (vs. silence) in Med. vs. Rest (state) and EMs vs. NMs (group) ( $P < 0.05$  corrected). \*,  $P < 0.05$ ; \*\*,  $P < 0.01$ ; \*\*\*,  $P < 0.005$ .
