# Supplementary material
Source: PubMed Central journal article supplement (PMC2040924)
Supplement: pnas_0606552104_8.pdf [file pnas_0606552104_8.pdf]

**Table 7. Regions showing correlation of activation to distracting sounds in meditation block with hours of practice, within the EMs**

| ROI                                       | Volume, mm <sup>3</sup> | <i>x, y, z</i> | <i>r</i> value | Partial <i>r</i> value |
|-------------------------------------------|-------------------------|----------------|----------------|------------------------|
| Negatively correlated with hours          |                         |                |                |                        |
| P. Cing BA23/31                           | 6,186                   | -1, -48, 25    | -0.79**        | -0.70*                 |
| Right IPL/ ventral PoCS<br>BA40           | 2,241                   | 53, -21, 24    | -0.71*         | -0.55*                 |
| Right para/fusiform<br>BA36/37            | 1,971                   | 31, -24, -19   | -0.87***       | -0.82***               |
| Bi. ventral MFG/Acc<br>BA10/32            | 1,355                   | 3, 52, 5       | -0.75**        | -0.64*                 |
| Right aSTG/IFG                            | 808                     | 41, 21, -14    | -0.79**        | -0.75**                |
| Left pSTG/MTG                             | 736                     | -38, -52, 13   | -0.80**        | -0.76**                |
| Right pSTG/MTG <sup>†</sup>               | 621                     | 49, -48, 17    | -0.71*         | -0.56                  |
| Right amygdala <sup>†</sup>               | 322                     | 29, -6, -13    | -0.75**        | -0.66*                 |
| Right TT amygdala with<br>negative sounds | 1,149                   | -23, 5, -15    | -0.76**        | -0.64*                 |
| Right TT amygdala with<br>positive sounds |                         |                | -0.13          | -0.04                  |
| Positively correlated with hours          |                         |                |                |                        |
| Left Ins (anterior/dorsal),<br>preCG BA13 | 3,408                   | -42, 10, 10    | 0.84**         | 0.89***                |
| Left subthalamus                          | 1,929                   | -9, -28, -8    | 0.84**         | 0.89***                |
| Right subthalamus                         | 1,670                   | 13, -14, -5    | 0.74**         | 0.90***                |
| Left IFG BA47                             | 1,423                   | -29, 4, -13    | 0.83**         | 0.89***                |
| Right SMA BA6                             | 954                     | 5, -3, 59      | 0.75**         | 0.67*                  |
| Right visual cortex, BA18                 | 942                     | 16, -77, -6    | 0.63*          | 0.78**                 |
| Right IPS/IPL                             | 941                     | -50, -39, 49   | 0.82**         | 0.83**                 |
| Left prcn BA7                             | 937                     | -23, -69, 35   | 0.75**         | 0.85**                 |
| Right IFG/aSTG BA47/38                    | 865                     | 27, 17, -29    | 0.72**         | 0.68*                  |
| Right IFG/MFG BA47                        | 838                     | 43, 41, -4     | 0.75**         | 0.83**                 |
| Left globus pallidus                      | 708                     | -19, -8, 0     | 0.79**         | 0.85***                |
| Left cerebellar tonsil <sup>†</sup>       | 498                     | -26, -51, -31  | 0.68*          | 0.83**                 |
| Left visual cortex, BA18 <sup>†</sup>     | 482                     | -13, -74, -3   | 0.65*          | 0.82**                 |
| Left IFG/MFG, BA40 <sup>†</sup>           | 330                     | -37, 33, -7    | -0.76**        | 0.78**                 |

Results from voxel-wise regression with hours of practice vs. response to all distracting sounds together ( $P < 0.02$ ). All regions significantly correlated with hours alone. Partial correlations accounting for age are listed. \*,  $P < 0.05$ ; \*\*,  $P < 0.01$ ; \*\*\*,  $P < 0.001$ . TT, Talairach–Tournoux, from AFNI's database of Talairach-defined regions.

<sup>†</sup>Clusters smaller than corrected.
