# Supplementary material
Source: PubMed Central journal article supplement (PMC2040924)
Supplement: pnas_0606552104_9.pdf [file pnas_0606552104_9.pdf]

**Table 8. Regions that correlated with hours of practice for negative sounds in mediation in the EMs**

| ROI                                         | Volume, mm <sup>3</sup> | <i>x</i> | <i>y</i> | <i>z</i> | <i>r</i> value | Partial <i>r</i> |
|---------------------------------------------|-------------------------|----------|----------|----------|----------------|------------------|
| Negatively correlate with hours of practice |                         |          |          |          |                |                  |
| Bi MeFG/ACC<br>BA32, BA24<br>BA10           | 3,065                   | -5.4     | 37.9     | -0.5     | -0.69*         | -0.53            |
| Right TPJ,<br>pSTG/pMTG/IPL<br>BA13/22/39   | 2,761                   | 49.5     | -51.8    | 16.2     | -0.68*         | -0.58            |
| Left MTG/STG,<br>BA39                       | 1,205                   | -42      | -56.3    | 17.8     | -0.65*         | -0.57            |
| Right<br>amygdala/parahipp<br>ocampus       | 1,169                   | 27.8     | -2.4     | -16.2    | -0.72**        | -0.59            |
| Right<br>postCG/STG,<br>BA40/42             | 915                     | 53.5     | -21.8    | 22.8     | -0.80**        | -0.76**          |
| Right aMTG/aSTG<br>BA 38/21                 | 864                     | 48.3     | 6.8      | -22.8    | -0.64*         | -0.50            |
| Left precuneus BA<br>31/7                   | 790                     | -0.2     | -48.1    | 35.4     | -0.59*         | -0.42            |
| Positively correlate with hours of practice |                         |          |          |          |                |                  |
| Left tonsil                                 | 1,441                   | -28      | -54.8    | -32.3    | 0.90***        | 0.91***          |
| Left<br>subthalamus/red<br>nuc./subnigra    | 1,003                   | -7.9     | -25.9    | -8.1     | 0.63*          | 0.59             |

Clusters are  $P < 0.02$ , corrected for multiple comparison. Reported are both  $r$  values for correlation with activation in response to negative sounds during meditation vs. hours and partial  $r$  values that account for age. \*,  $P < 0.02$ ; \*\*,  $P < 0.01$ ; \*\*\*,  $P < 0.001$ .
