# Supplementary material
Source: PubMed Central journal article supplement (PMC2040924)

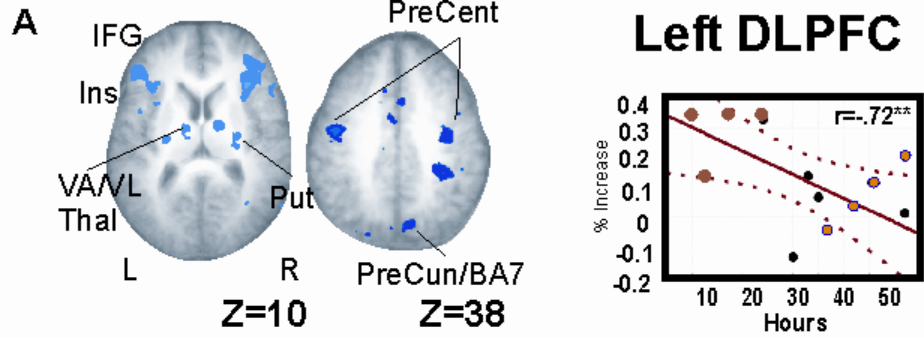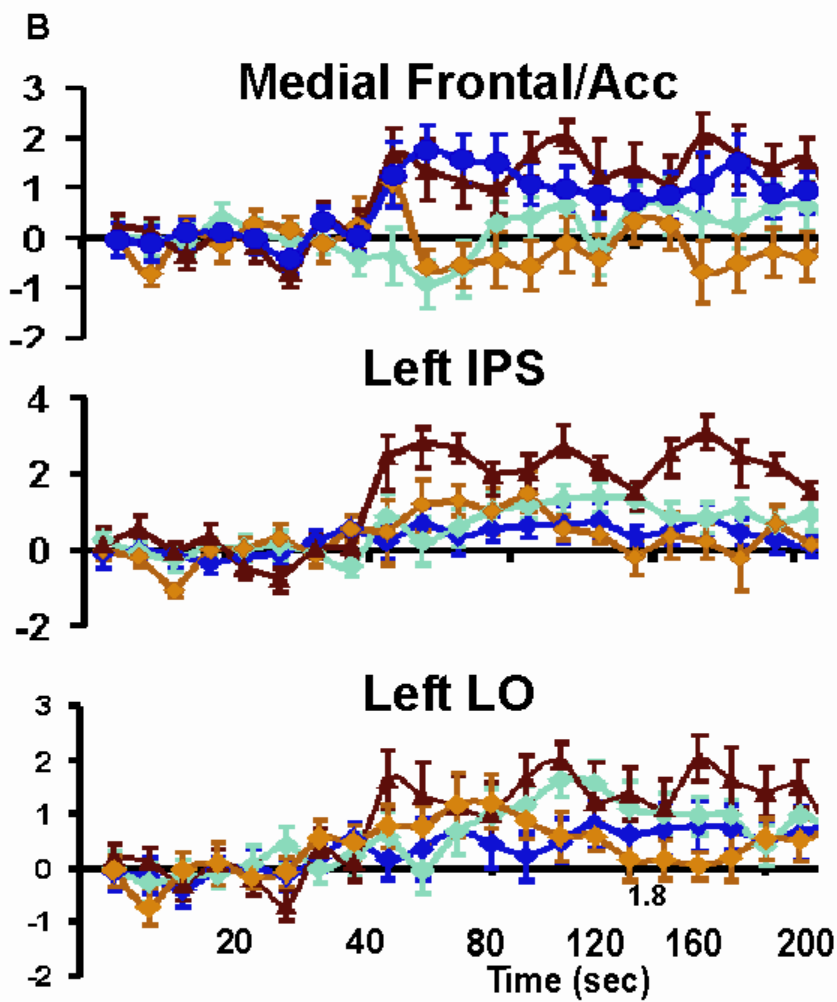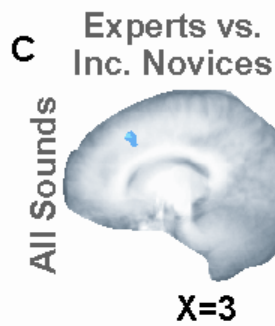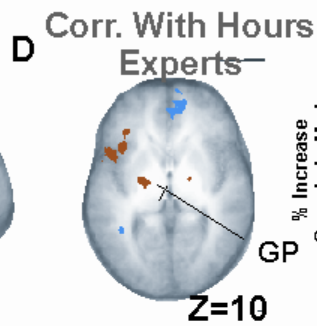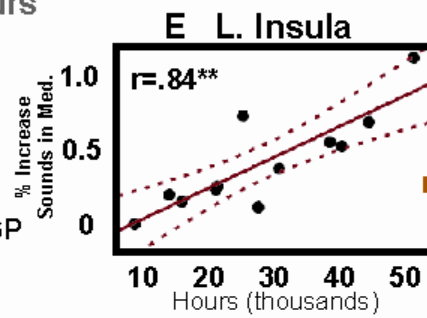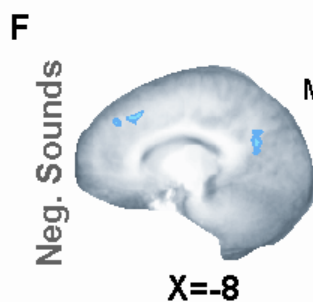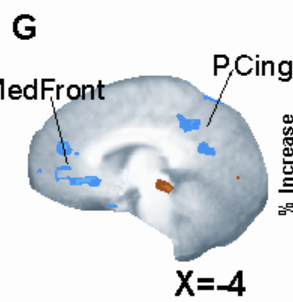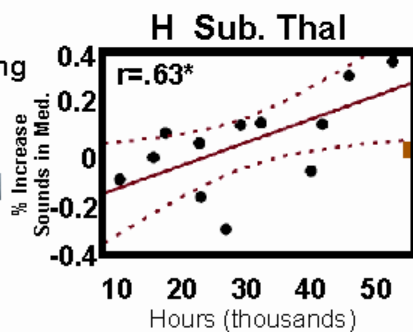

Supplement: pnas_0606552104_2.pdf [file pnas_0606552104_2.pdf]

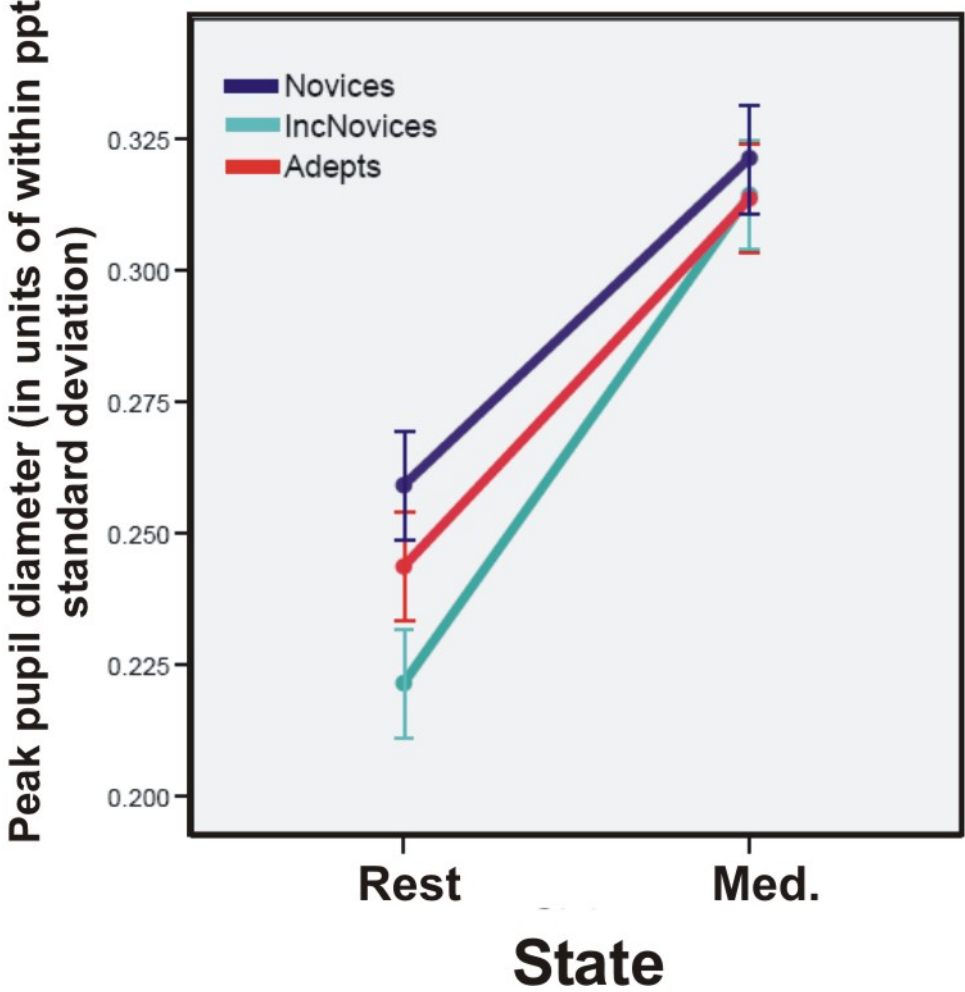

Supplement: pnas_0606552104_4.pdf [file pnas_0606552104_4.pdf]
